# Supplementary material for: Increased Alveolar Heparan Sulphate and Reduced Pulmonary Surfactant Amount and Function in the Mucopolysaccharidosis IIIA Mouse
Source: PubMed Central journal article supplement (PMC8070179; doi:10.3390/cells10040849), 2021-04-08
Supplement: cells-10-00849-s001.pdf [file cells-10-00849-s001.pdf]

Supplementary Material:

**Table S1:** Diagnostic MS/MS scans for head groups

b = second injection, c = third injection and d = fourth injection

| MS  | Scan | MS/MS Mode          | Lipids             | Range (m/z) |                                                                                                                                                                  |
|-----|------|---------------------|--------------------|-------------|------------------------------------------------------------------------------------------------------------------------------------------------------------------|
| ES+ | b    | Precursor of 184    | PC                 | 400:900     | PC species containing the phosphorylcholine head group                                                                                                           |
| ES+ | c    | Neutral Loss of 141 | PE                 | 400:900     | PL species containing the phosphoylethanol-amine head group                                                                                                      |
| ES- | c    | Precursor of 153    | PG, PA, PS & PI    | 400:900     | Acidic PL species generating the glycerophosphate fragment ion (phosphatidylglycerol, phosphatidic acid, phosphatidylserine and phosphatidylinositol head group) |
| ES- | c    | Precursor of 241    | PI                 | 400:900     | PI species containing the phosphoinositol head group                                                                                                             |
| ES- | c    | Neutral Loss of 87  | PS                 | 400:900     | PS species containing the serine head group                                                                                                                      |
| ES+ | c    | Precursor of 264    | Ceramide           | 480-680     | Species containing the ceramide headgroup                                                                                                                        |
| ES+ | c    | Precursor of 369    | Cholesteryl esters | 500-750     | Any cholesteryl esters                                                                                                                                           |
| ES+ | c    | Neutral Loss of 35  | Diacylglycerol     | 350-700     | Any diacylglycerol species                                                                                                                                       |
| ES- | d    | Precursor of 227    | 14:0               | 580-900     | Fatty acid 14:0                                                                                                                                                  |
| ES- | d    | Precursor of 241    |                    | 580-900     | Not relevant to our study                                                                                                                                        |
| ES- | d    | Precursor of 253    | 16:1               | 580-900     | Fatty acid 16:1                                                                                                                                                  |
| ES- | d    | Precursor of 255    | 16:0               | 580-900     | Fatty acid 16:0                                                                                                                                                  |
| ES- | d    | Precursor of 271    |                    | 580-900     | Not relevant to our study                                                                                                                                        |
| ES- | d    | Precursor of 277    | 18:3               | 580-900     | Fatty acid 18:3                                                                                                                                                  |
| ES- | d    | Precursor of 279    | 18:2               | 580-900     | Fatty acid 18:2                                                                                                                                                  |
| ES- | d    | Precursor of 281    | 18:1               | 580-900     | Fatty acid 18:1                                                                                                                                                  |
| ES- | d    | Precursor of 283    | 18:0               | 580-900     | Fatty acid 18:0                                                                                                                                                  |
| ES- | d    | Precursor of 299    | 20:6               | 580-900     | Fatty acid 20:6                                                                                                                                                  |
| ES- | d    | Precursor of 301    | 20:5               | 580-900     | Fatty acid 20:5                                                                                                                                                  |
| ES- | d    | Precursor of 303    | 20:4               | 580-900     | Fatty acid 20:4                                                                                                                                                  |
| ES- | d    | Precursor of 305    | 20:3               | 580-900     | Fatty acid 20:3                                                                                                                                                  |
| ES- | d    | Precursor of 327    | 22:6               | 580-900     | Fatty acid 22:6                                                                                                                                                  |
| ES- | d    | Precursor of 329    | 22:5               | 580-900     | Fatty acid 22:5                                                                                                                                                  |
| ES- | d    | Precursor of 331    | 22:4               | 580-900     | Fatty acid 22:4                                                                                                                                                  |

**Table S2: PC species values**

| Molecular species<br>Generic formula | Structure   | Mass |
|--------------------------------------|-------------|------|
| PC30:0                               | PC16:0/14:0 | 706  |
| PC32:1                               | PC16:0/16:1 | 732  |
| PC32:0                               | PC16:0/16:0 | 734  |
| PC34:2                               | PC16:0/18:2 | 758  |
| PC34:1                               | PC16:0/18:1 | 760  |
| PC34:0                               | PC18:0/16:0 | 762  |
| PC36:4                               | PC16:0/20:4 | 782  |
| PC36:3                               | PC18:1/18:2 | 784  |
| PC36:2                               | PC18:0/18:2 | 786  |
| PC36:1                               | PC18:0/18:1 | 788  |
| PC38:6                               | PC16:0/22:6 | 806  |
| PC38:5                               | PC18:1/20:4 | 808  |
| PC38:4                               | PC18:0/20:4 | 810  |
| PC40:7                               | PC18:1/22:6 | 832  |
| PC40:6                               | PC18:0/22:6 | 834  |

**Table S3: Complete data for wildtype, heterozygous, control and MPS IIIA groups**

|                         |                 | Species           | Wildtype      | n  | Heterozygous  |   | Control       | MPS IIIA       | n  | p-value  |
|-------------------------|-----------------|-------------------|---------------|----|---------------|---|---------------|----------------|----|----------|
| <b>Heparan sulphate</b> |                 |                   |               |    |               |   |               |                |    |          |
| Tissue                  | ng/mg protein   |                   | 64.85 ± 9.0   | 9  | 75.13 ± 25.5  | 8 | 70.00 ± 19.21 | 3511 ± 584.5   | 11 | <0.0001* |
| BALF                    | ng/mL           |                   | 14.78 ± 4.0   | 9  | 18.86 ± 8.2   | 7 | 16.56 ± 6.25  | 400.2 ± 98.3   | 13 | <0.0001* |
| <b>Gangliosides</b>     |                 |                   |               |    |               |   |               |                |    |          |
| Tissue                  | pmol/mg protein | GM3<br>d18.1/16.0 | 7.66 ± 4.21   | 9  | 6.70 ± 2.85   | 8 | 7.21 ± 2.46   | 12.26 ± 2.53   | 11 | <0.0001* |
| Tissue                  | pmol/mg protein | GM3<br>d18.0/22.0 | 16.85 ± 4.2   | 8  | 15.49 ± 2.13  | 8 | 16.17 ± 3.3   | 22.33 ± 7.57   | 11 | 0.0077*  |
| Tissue                  | pmol/mg protein | GM3<br>d18:1/24:1 | 28.34 ± 11.49 | 9  | 17.99 ± 4.467 | 8 | 23.47 ± 2.46  | 27.69 ± 2.76   | 11 | 0.2746   |
| Tissue                  | pmol/mg protein | GM3<br>d18:1/24:0 | 7.93 ± 3.24   | 9  | 6.43 ± 2.88   | 8 | 7.23 ± 0.75   | 9.28 ± 1.10    | 11 | 0.1201   |
| Tissue                  | pmol/mg protein | GM1<br>d18:1/16:0 | 12.54 ± 5.16  | 9  | 10.88 ± 3.11  | 8 | 11.76 ± 1.04  | 13.18 ± 1.08   | 11 | 0.3689   |
| <b>BMP</b>              |                 |                   |               |    |               |   |               |                |    |          |
| Tissue                  | pmol/mg protein | Total             | 78.86 ± 16.23 | 10 | 81.98 ± 13.96 | 8 | 80.25 ± 14.91 | 106.66 ± 17.03 | 11 | 0.0002*  |
| Tissue                  | pmol/mg protein | 18.1/18.1         | 11.75 ± 2.96  | 10 | 12.47 ± 2.75  | 8 | 12.05 ± 2.81  | 22.10 ± 3.91   | 10 | <0.0001* |
| Tissue                  | pmol/mg protein | 18.1/18.2         | 5.73 ± 1.42   | 10 | 6.20 ± 1.28   | 8 | 5.94 ± 1.34   | 9.63 ± 1.69    | 10 | <0.0001* |
| Tissue                  | pmol/mg protein | 18.1/20.4         | 2.90 ± 0.59   | 10 | 2.93 ± 0.81   | 8 | 3.18 ± 1.00   | 3.99 ± 0.73    | 10 | 0.0038*  |

|                    |                 |           |               |    |               |   |                |                |    |          |
|--------------------|-----------------|-----------|---------------|----|---------------|---|----------------|----------------|----|----------|
| Tissue             | pmol/mg protein | 18.1/22.4 | 0.46 ± 0.18   | 10 | 0.51 ± 0.16   | 8 | 0.48 ± 0.17    | 1.03 ± 0.20    | 10 | <0.0001* |
| Tissue             | pmol/mg protein | 18.1/22.5 | 1.88 ± 0.60   | 10 | 1.90 ± 0.22   | 8 | 1.89 ± 0.51    | 3.47 ± 0.64    | 10 | <0.0001* |
| Tissue             | pmol/mg protein | 18.1/22.6 | 6.68 ± 1.63   | 10 | 7.09 ± 1.68   | 8 | 6.87 ± 1.62    | 10.63 ± 2.32   | 10 | <0.0001* |
| Tissue             | pmol/mg protein | 20.4/22.6 | 0.95 ± 0.22   | 9  | 1.08 ± 0.32   | 8 | 1.01 ± 0.27    | 1.33 ± 0.32    | 10 | 0.0106*  |
| Tissue             | pmol/mg protein | 22.5/22.6 | 1.13 ± 0.38   | 10 | 1.10 ± 0.24   | 8 | 1.12 ± 0.32    | 1.72 ± 0.51    | 10 | 0.0006*  |
| Tissue             | pmol/mg protein | 22.6/22.6 | 5.44 ± 1.72   | 10 | 5.72 ± 1.37   | 8 | 5.57 ± 1.53    | 7.80 ± 2.48    | 10 | 0.0064*  |
| Tissue             | pmol/mg protein | 16:0/16:0 | 11.81 ± 2.50  | 10 | 12.03 ± 1.62  | 8 | 11.91 ± 0.493  | 12.05 ± 0.362  | 10 | 0.8423   |
| Tissue             | pmol/mg protein | 16:1/16:0 | 2.04 ± 0.55   | 10 | 2.23 ± 0.32   | 8 | 2.13 ± 0.108   | 2.16 ± 0.095   | 10 | 0.8347   |
| Tissue             | pmol/mg protein | 16:1/18:1 | 1.59 ± 0.44   | 10 | 1.65 ± 0.33   | 8 | 1.61 ± 0.092   | 1.88 ± 0.100   | 10 | 0.0757   |
| Tissue             | pmol/mg protein | 18:0/16:0 | 1.03 ± 0.20   | 10 | 1.04 ± 0.18   | 8 | 1.04 ± 0.044   | 1.08 ± 0.042   | 10 | 0.5165   |
| Tissue             | pmol/mg protein | 18:1/16:0 | 20.36 ± 3.87  | 10 | 20.74 ± 2.64  | 8 | 20.53 ± 0.776  | 22.46 ± 0.883  | 10 | 0.1301   |
| Tissue             | pmol/mg protein | 18:1/18:0 | 4.30 ± 0.97   | 10 | 4.46 ± 0.87   | 8 | 4.37 ± 0.213   | 4.746 ± 0.209  | 10 | 0.2609   |
| Tissue             | pmol/mg protein | 20:4/20:4 | 0.49 ± 0.27   | 10 | 0.51 ± 0.24   | 8 | 0.50 ± 0.058   | 0.51 ± 0.039   | 10 | 0.8823   |
| BALF               | pmol/mL         | Total     | 757.4 ± 111.5 | 9  | 672.0 ± 68.52 | 7 | 720 ± 102.1    | 685.0 ± 119.0  | 13 | 0.4012   |
| BALF               | pmol/mL         | 18.1/18.1 | 95.73 ± 17.38 | 9  | 83.09 ± 11.39 | 7 | 90.2 ± 15.96   | 77.07 ± 17.28  | 13 | 0.0430*  |
| BALF               | pmol/mL         | 18.1/20.4 | 19.04 ± 3.64  | 9  | 14.19 ± 6.20  | 7 | 16.92 ± 5.35   | 12.76 ± 4.17   | 13 | 0.0300*  |
| BALF               | pmol/mL         | 18.1/22.6 | 45.13 ± 6.70  | 9  | 30.84 ± 13.05 | 7 | 38.88 ± 12.07  | 29.8 ± 8.92    | 13 | 0.0325*  |
| BALF               | pmol/mL         | 16:0/16:0 | 145.7 ± 20.33 | 9  | 136.0 ± 21.85 | 7 | 141.50 ± 5.221 | 147.80 ± 6.352 | 13 | 0.4429   |
| BALF               | pmol/mL         | 16:1/16:0 | 21.72 ± 3.57  | 9  | 20.44 ± 3.95  | 7 | 21.16 ± 0.917  | 20.31 ± 0.866  | 13 | 0.5116   |
| BALF               | pmol/mL         | 16:1/18:1 | 12.61 ± 2.50  | 9  | 11.62 ± 1.61  | 7 | 12.18 ± 0.536  | 10.67 ± 0.486  | 13 | 0.0510   |
| BALF               | pmol/mL         | 18:0/16:0 | 17.15 ± 2.37  | 9  | 16.85 ± 4.26  | 7 | 17.02 ± 0.802  | 17.03 ± 0.971  | 13 | 0.9937   |
| BALF               | pmol/mL         | 18:0/18:0 | 1.79 ± 0.34   | 9  | 1.71 ± 0.23   | 7 | 1.76 ± 0.072   | 1.81 ± 0.106   | 13 | 0.6299   |
| BALF               | pmol/mL         | 18:1/16:0 | 246.2 ± 44.62 | 9  | 227.4 ± 25.89 | 7 | 238.0 ± 9.43   | 235.9 ± 10.09  | 13 | 0.8803   |
| BALF               | pmol/mL         | 18:1/18:0 | 73.71 ± 12.81 | 9  | 66.86 ± 7.08  | 7 | 70.72 ± 2.737  | 66.94 ± 3.841  | 13 | 0.4195   |
| BALF               | pmol/mL         | 18:1/18:2 | 42.91 ± 4.67  | 9  | 38.22 ± 6.14  | 7 | 40.86 ± 1.425  | 38.21 ± 2.764  | 13 | 0.3751   |
| BALF               | pmol/mL         | 18:1/22:4 | 1.78 ± 0.40   | 9  | 1.426 ± 0.61  | 7 | 1.63 ± 0.129   | 1.31 ± 0.116   | 13 | 0.0839   |
| BALF               | pmol/mL         | 18:1/22:5 | 10.09 ± 2.31  | 9  | 6.74 ± 2.49   | 7 | 8.62 ± 0.719   | 6.84 ± 0.526   | 13 | 0.0648   |
| BALF               | pmol/mL         | 20:4/20:4 | 1.00 ± 0.37   | 9  | 0.8586 ± 0.56 | 7 | 0.92 ± 0.113   | 0.79 ± 0.110   | 13 | 0.4180   |
| BALF               | pmol/mL         | 20:4/22:6 | 3.36 ± 0.62   | 9  | 2.54 ± 1.58   | 7 | 3.00 ± 0.294   | 2.53 ± 0.270   | 13 | 0.2601   |
| BALF               | pmol/mL         | 22:5/22:6 | 3.03 ± 0.54   | 9  | 1.81 ± 1.16   | 7 | 2.50 ± 0.260   | 2.24 ± 0.220   | 13 | 0.4667   |
| BALF               | pmol/mL         | 22:6/22:6 | 16.46 ± 2.15  | 9  | 11.35 ± 6.48  | 7 | 14.22 ± 1.277  | 13.03 ± 1.484  | 13 | 0.5449   |
| <b>Cholesterol</b> |                 |           |               |    |               |   |                |                |    |          |
| Tissue             | pmol/mL         | Total     | 2422 ± 839.9  | 10 | 2601 ± 556.1  | 8 | 2501 168.2     | 2721 154.7     | 10 | 0.3490   |
| Tissue             | pmol/mL         | Free      | 913.0 ± 519.1 | 10 | 991.3 ± 263.3 | 8 | 947.8 ± 415.7  | 977.7 ± 220.0  | 10 | 0.8350   |
| Tissue             | pmol/mL         | CE18:3    | 23.76 ± 12.38 | 10 | 23.26 ± 5.16  | 8 | 23.54 ± 9.60   | 25.74 ± 8.159  | 10 | 0.5455   |
| Tissue             | pmol/mL         | CE18:2    | 491.4 ± 280   | 10 | 512.6 ± 106.4 | 8 | 500.8 ± 215.1  | 504.7 133.3    | 10 | 0.9592   |

|        |         |        |               |    |               |   |                |               |    |         |
|--------|---------|--------|---------------|----|---------------|---|----------------|---------------|----|---------|
| Tissue | pmol/mL | CE20:4 | 302.3 ± 175.5 | 10 | 348.7 ± 141.4 | 8 | 322.9 ± 158.5  | 338.7 ± 71.29 | 10 | 0.7688  |
| Tissue | pmol/mL | CE20:3 | 27.67 ± 13.15 | 10 | 31.66 ± 10.57 | 8 | 29.44 ± 11.90  | 30.64 ± 8.95  | 10 | 0.7845  |
| Tissue | pmol/mL | CE22:6 | 68.01 ± 42.93 | 10 | 75.09 ± 27.83 | 8 | 71.16 ± 36.16  | 77.97 ± 14.81 | 10 | 0.5761  |
| BALF   | pmol/mL | Total  | 5647 ± 758.3  | 9  | 5386 ± 982.7  | 7 | 5533 ± 843.2   | 4416 ± 968.2  | 13 | 0.0100* |
| BALF   | pmol/mL | Free   | 4283 ± 584.6  | 9  | 4149 ± 597.3  | 7 | 4224 ± 574.2   | 3858 948.6    | 13 | 0.2105  |
| BALF   | pmol/mL | CE18:3 | 27.92 ± 6.62  | 9  | 26.25 ± 12.55 | 7 | 29.00 ± 6.09   | 12.5 ± 5.18   | 13 | 0.0002* |
| BALF   | pmol/mL | CE18:2 | 660.8 ± 187.7 | 9  | 624.3 ± 270.3 | 7 | 644.8 ± 219.9  | 290.4 ± 117.4 | 13 | 0.0001* |
| BALF   | pmol/mL | CE20:4 | 561.1 ± 218.8 | 9  | 498.5 ± 269.5 | 7 | 533.7 ± 235.8  | 210.3 ± 87.06 | 13 | 0.0004* |
| BALF   | pmol/mL | CE22:6 | 114.7 ± 37.1  | 9  | 87.82 ± 45.95 | 7 | 102.90 ± 42.05 | 44.59 ± 19    | 13 | 0.0001* |

**Phospholipid composition and alterations in total alveolar phospholipid pool size**

|        |      |                 |              |   |               |   |              |              |    |           |
|--------|------|-----------------|--------------|---|---------------|---|--------------|--------------|----|-----------|
| BALF   | %PL  | PC              | 82.93 ± 0.25 | 3 | 81.54 ± 1.66  | 6 | 82.73 ± 0.42 | 80.29 ± 4.25 | 13 | 0.1515    |
| BALF   | %PL  | PG              | 15.29 ± 0.37 | 3 | 16.36 ± 1.79  | 6 | 15.25 ± 0.33 | 17.54 ± 4.13 | 14 | 0.1659    |
| BALF   | %PL  | PE              | 1.27 ± 0.10  | 3 | 1.43 ± 0.11   | 6 | 1.38 ± 0.13  | 1.12 ± 0.28  | 13 | 0.0004*   |
| BALF   | %PL  | PS              | 0.21 ± 0.02  | 3 | 0.35 ± 0.15   | 6 | 0.305 ± 0.13 | 0.230 ± 0.08 | 14 | 0.1060    |
| BALF   | %PL  | SM              | 0.21 ± 0.08  | 3 | 0.23 ± 0.07   | 6 | 0.226 ± 0.07 | 0.254 ± 0.11 | 14 | 0.5002    |
| Tissue | %PC  | 16:0/14:0       | 3.60 ± 0.45  | 3 | 3.86 ± 0.43   | 7 | 3.78 ± 0.43  | 3.56 ± 0.22  | 16 | 0.0905    |
| Tissue | %PC  | 16:0/16:1       | 12.83 ± 1.23 | 3 | 12.57 ± 1.00  | 7 | 12.64 ± 1.00 | 12.79 ± 0.62 | 16 | 0.6434    |
| Tissue | %PC  | 16:0/16:0       | 28.93 ± 1.00 | 3 | 28.43 ± 0.90  | 7 | 28.58 ± 0.90 | 28.40 ± 1.22 | 16 | 0.6937    |
| Tissue | %PC  | 16:0/18:2       | 8.01 ± 0.73  | 3 | 8.98 ± 0.25   | 7 | 8.69 ± 0.61  | 8.96 ± 0.78  | 16 | 0.3540    |
| Tissue | %PC  | 16:0/18:1       | 14.88 ± 0.39 | 3 | 15.01 ± 0.70  | 7 | 14.97 ± 0.60 | 14.38 ± 1.09 | 16 | 0.1313    |
| Tissue | %PC  | 18:0/16:0       | 1.77 ± 0.12  | 3 | 1.61 ± 0.26   | 7 | 1.66 ± 0.23  | 1.73 ± 0.22  | 16 | 0.4086    |
| Tissue | %PC  | 16:0/20:4       | 7.28 ± 0.87  | 3 | 7.09 ± 0.48   | 7 | 7.15 ± 0.58  | 7.53 ± 0.64  | 16 | 0.1327    |
| Tissue | %PC  | 18:1/18:2       | 2.06 ± 0.18  | 3 | 2.34 ± 0.20   | 7 | 2.26 ± 0.23  | 2.32 ± 0.22  | 16 | 0.5610    |
| Tissue | %PC  | 18:0/18:2       | 4.55 ± 0.44  | 3 | 4.64 ± 0.24   | 7 | 4.61 ± 0.29  | 4.66 ± 0.35  | 16 | 0.6988    |
| Tissue | %PC  | 18:0/18:1       | 3.20 ± 0.11  | 3 | 3.36 ± 0.21   | 7 | 3.31 ± 0.20  | 3.22 ± 0.25  | 16 | 0.3212    |
| Tissue | %PC  | 16:0/22:6       | 3.87 ± 0.60  | 3 | 3.62 ± 0.35   | 7 | 3.69 ± 0.42  | 3.60 ± 0.25  | 16 | 0.4561    |
| Tissue | %PC  | 18:1/20:4       | 1.80 ± 0.11  | 3 | 1.85 ± 0.19   | 7 | 1.83 ± 0.16  | 1.75 ± 0.18  | 16 | 0.2229    |
| Tissue | %PC  | 18:0/20:4       | 5.11 ± 0.27  | 3 | 4.80 ± 0.69   | 7 | 4.90 ± 0.59  | 5.22 ± 0.38  | 16 | 0.0976    |
| Tissue | %PC  | 22:5/18:2       | 0.41 ± 0.05  | 3 | 0.43 ± 0.06   | 7 | 0.43 ± 0.05  | 0.40 ± 0.04  | 16 | 0.1166    |
| Tissue | %PC  | 18:0/22:6       | 1.70 ± 0.28  | 3 | 1.42 ± 0.19   | 7 | 1.51 ± 0.24  | 1.49 ± 0.19  | 16 | 0.8376    |
| BALF   | %PC  | 16:0/14:0       | 6.40 ± 0.19  | 3 | 6.86 ± 0.85   | 7 | 6.72 ± 0.73  | 6.40 ± 0.55  | 14 | 0.2257    |
| BALF   | %PC  | 16:0/16:1       | 28.96 ± 1.11 | 3 | 27.81 ± 1.45  | 7 | 28.16 ± 1.40 | 27.26 ± 1.35 | 14 | 0.1282    |
| BALF   | %PC  | 16:0/16:0       | 43.77 ± 0.61 | 3 | 45.07 ± 1.99  | 7 | 44.68 ± 1.76 | 47.08 ± 1.71 | 14 | 0.0029*   |
| BALF   | %PC  | 16:0/18:2       | 5.52 ± 0.57  | 3 | 5.60 ± 0.83   | 7 | 5.58 ± 0.73  | 5.19 ± 0.62  | 14 | 0.1813    |
| BALF   | %PC  | 16:0/18:1       | 9.05 ± 1.42  | 3 | 9.14 ± 0.53   | 7 | 9.12 ± 0.80  | 8.80 ± 0.73  | 15 | 0.3238    |
| BALF   | %PC  | 18:0/16:0       | 1.04 ± 0.17  | 3 | 0.92 ± 0.15   | 7 | 0.96 ± 0.15  | 0.95 ± 0.20  | 15 | 0.9610    |
| BALF   | %PC  | 16:0/20:4       | 1.62 ± 0.08  | 3 | 1.35 ± 0.31   | 7 | 1.43 ± 0.29  | 1.32 ± 0.19  | 14 | 0.2743    |
| BALF   | %PC  | 18:1/18:2       | 0.25 ± 0.03  | 3 | 0.29 ± 0.07   | 7 | 0.28 ± 0.06  | 0.21 ± 0.06  | 15 | 0.0121*   |
| BALF   | %PC  | 18:0/18:2       | 0.42 ± 0.03  | 3 | 0.44 ± 0.10   | 7 | 0.41 ± 0.04  | 0.38 ± 0.06  | 14 | 0.1451    |
| BALF   | %PC  | 18:0/18:1       | 0.24 ± 0.04  | 3 | 0.25 ± 0.07   | 7 | 0.25 ± 0.06  | 0.25 ± 0.05  | 14 | 0.9101    |
| BALF   | %PC  | 16:0/22:6       | 1.93 ± 0.35  | 3 | 1.42 ± 0.29   | 7 | 1.70 ± 0.51  | 1.48 ± 0.22  | 14 | 0.1487    |
| BALF   | %PC  | 18:1/20:4       | 0.22 ± 0.01  | 3 | 0.22 ± 0.08   | 7 | 0.22 ± 0.06  | 0.19 ± 0.03  | 14 | 0.2114    |
| BALF   | %PC  | 18:0/20:4       | 0.30 ± 0.05  | 3 | 0.24 ± 0.05   | 7 | 0.26 ± 0.05  | 0.21 ± 0.07  | 15 | 0.1059    |
| BALF   | %PC  | 22:5/18:2       | 0.03 ± 0.01  | 3 | 0.03 ± 0.01   | 7 | 0.03 ± 0.01  | 0.02 ± 0.01  | 15 | 0.0724    |
| BALF   | %PC  | 18:0/22:6       | 0.25 ± 0.06  | 3 | 0.17 ± 0.04   | 7 | 0.19 ± 0.06  | 0.15 ± 0.05  | 15 | 0.1190    |
| BALF   | nmol | Total pool size | 259.9 ± 64.3 | 3 | 271.4 ± 100.4 | 7 | 267.6 ± 85.8 | 134.6 ± 36.7 | 14 | < 0.0001* |

**mRNA**

|        |     |      |             |    |             |   |             |             |    |         |
|--------|-----|------|-------------|----|-------------|---|-------------|-------------|----|---------|
| Tissue | MNE | SP-A | 8.06 ± 1.87 | 15 | 9.08 ± 2.91 | 8 | 8.41 ± 2.28 | 6.83 ± 1.38 | 18 | 0.0184* |
|--------|-----|------|-------------|----|-------------|---|-------------|-------------|----|---------|

|                                                  |                |                           |                |    |                |    |                |                |    |          |
|--------------------------------------------------|----------------|---------------------------|----------------|----|----------------|----|----------------|----------------|----|----------|
| Tissue                                           | MNE            | SP-B                      | 5.94 ± 1.26    | 15 | 6.22 ± 1.59    | 8  | 6.04 ± 1.35    | 5.84 ± 0.78    | 18 | 0.5782   |
| Tissue                                           | MNE            | SP-C                      | 4.14 ± 1.69    | 15 | 4.28 ± 2.10    | 8  | 4.19 ± 1.80    | 2.16 ± 0.84    | 18 | 0.0001*  |
| Tissue                                           | MNE            | SP-D                      | 0.29 ± 0.05    | 14 | 0.31 ± 0.09    | 8  | 0.30 ± 0.06    | 0.24 ± 0.06    | 19 | 0.0173*  |
| <b>Surfactant Protein</b>                        |                |                           |                |    |                |    |                |                |    |          |
| Tissue                                           | %total protein | SP-A                      | 0.027 ± 0.008  | 13 | 0.030 ± 0.007  | 9  | 0.028 ± 0.008  | 0.026 ± 0.010  | 17 | 0.3176   |
| Tissue                                           | %total protein | SP-B                      | 0.005 ± 0.002  | 12 | 0.006 ± 0.002  | 8  | 0.0058 ± 0.002 | 0.0063 ± 0.002 | 16 | 0.3480   |
| Tissue                                           | %total protein | SP-C                      | 0.050 ± 0.036  | 12 | 0.050 ± 0.025  | 9  | 0.050 ± 0.031  | 0.040 ± 0.025  | 18 | 0.2773   |
| Tissue                                           | %total protein | SP-D                      | 0.0044 ± 0.003 | 12 | 0.0072 ± 0.004 | 10 | 0.0057 ± 0.004 | 0.0036 ± 0.003 | 19 | 0.0443*  |
| BALF                                             | %total protein | SP-A                      | 0.43 ± 0.11    | 5  | 0.39 ± 0.13    | 4  | 0.41 ± 0.11    | 0.25 ± 0.10    | 13 | 0.0027*  |
| BALF                                             | %total protein | SP-B                      | 0.034 ± 0.012  | 6  | 0.036 ± 0.013  | 4  | 0.035 ± 0.012  | 0.030 ± 0.013  | 13 | 0.3393   |
| BALF                                             | %total protein | SP-C                      | 0.022 ± 0.006  | 6  | 0.023 ± 0.018  | 6  | 0.022 ± 0.012  | 0.010 ± 0.005  | 13 | 0.0024*  |
| BALF                                             | %total protein | SP-D                      | 0.172 ± 0.050  | 6  | 0.220 ± 0.129  | 5  | 0.194 ± 0.093  | 0.132 ± 0.046  | 13 | 0.0438*  |
| <b>Captive Bubble Surfactometry - BALF</b>       |                |                           |                |    |                |    |                |                |    |          |
| <b>Initial adsorption – two way-ANOVA</b>        |                |                           |                |    |                |    |                |                |    |          |
| BALF                                             | Timepoint      | 0s                        |                |    |                | 10 | 64.06 ± 1.25   | 64.05 ± 3.00   | 6  |          |
| BALF                                             | Timepoint      | 1s                        |                |    |                | 10 | 21.09 ± 0.73   | 29.73 ± 9.78   | 6  |          |
| BALF                                             | Timepoint      | 5s                        |                |    |                | 10 | 20.34 ± 0.75   | 26.94 ± 8.81   | 6  |          |
| BALF                                             | Timepoint      | 20s                       |                |    |                | 10 | 19.93 ± 0.55   | 24.77 ± 8.17   | 6  |          |
| BALF                                             | Timepoint      | 60s                       |                |    |                | 10 | 19.63 ± 0.55   | 22.93 ± 7.27   | 6  |          |
| BALF                                             | Timepoint      | 180s                      |                |    |                | 10 | 19.34 ± 0.45   | 21.68 ± 5.43   | 6  |          |
| BALF                                             | Timepoint      | 300s                      |                |    |                | 10 | 19.16 ± 0.46   | 20.79 ± 4.12   | 6  |          |
| BALF                                             |                | Time*Genotype interaction |                |    |                |    |                |                |    | <0.0001* |
| BALF                                             |                | Time                      |                |    |                |    |                |                |    | <0.0001* |
| BALF                                             |                | Genotype                  |                |    |                |    |                |                |    | 0.0593   |
| <b>Post expansion adsorption - two-way ANOVA</b> |                |                           |                |    |                |    |                |                |    |          |
| BALF                                             | Timepoint      | 0s                        |                |    |                | 10 | 26.47 ± 3.67   | 36.41 ± 11.25  |    |          |
| BALF                                             | Timepoint      | 1s                        |                |    |                | 10 | 23.83 ± 2.44   | 32.52 ± 10.31  |    |          |
| BALF                                             | Timepoint      | 5s                        |                |    |                | 10 | 21.37 ± 0.45   | 28.42 ± 9.14   |    |          |
| BALF                                             | Timepoint      | 20s                       |                |    |                | 10 | 20.80 ± 0.42   | 24.92 ± 6.28   |    |          |
| BALF                                             | Timepoint      | 60s                       |                |    |                | 10 | 20.54 ± 0.37   | 22.72 ± 4.07   |    |          |
| BALF                                             | Timepoint      | 180s                      |                |    |                | 10 | 20.32 ± 0.33   | 21.03 ± 1.42   |    |          |
| BALF                                             | Timepoint      | 300s                      |                |    |                | 10 | 20.07 ± 0.40   | 20.57 ± 1.20   |    |          |
| BALF                                             |                | Time*Genotype interaction |                |    |                |    |                |                |    | <0.0001* |
| BALF                                             |                | Time                      |                |    |                |    |                |                |    | <0.0001* |
| BALF                                             |                | Genotype                  |                |    |                |    |                |                |    | 0.0253*  |
| <b>Surface tension</b>                           |                |                           |                |    |                |    |                |                |    |          |
| BALF                                             | γ(mN/m)        | γ <sub>min</sub>          | 1.60 ± 0.34    | 6  | 1.33 ± 0.27    | 4  | 1.49 ± 0.34    | 8.59 ± 4.83    | 6  | 0.0003*  |
| BALF                                             | γ(mN/m)        | γ <sub>max</sub>          | 28.93 ± 0.05   | 6  | 29.57 ± 1.27   | 4  | 29.19 ± 0.88   | 36.77 ± 8.38   | 6  | 0.0115*  |
| <b>Surface area</b>                              |                |                           |                |    |                |    |                |                |    |          |
| BALF                                             |                | 1 <sup>st</sup> cycle     | 0.319 ± 0.05   | 6  | 0.251 ± 0.025  | 4  | 0.291 ± 0.05   | 0.440 ± 0.07   | 6  | 0.0003*  |
| BALF                                             |                | 10 <sup>th</sup> cycle    | 0.123 ± 0.06   | 6  | 0.100 ± 0.02   | 4  | 0.114 ± 0.05   | 0.382 ± 0.14   | 6  | <0.0001* |

|                        |                        |               |   |               |   |               |               |   |          |
|------------------------|------------------------|---------------|---|---------------|---|---------------|---------------|---|----------|
| BALF                   | 20 <sup>th</sup> cycle | 0.104 ± 0.04  | 6 | 0.092 ± 0.01  | 4 | 0.100 ± 0.03  | 0.379 ± 0.14  | 6 | <0.0001* |
| <b>Compressibility</b> |                        |               |   |               |   |               |               |   |          |
| BALF                   | 1 <sup>st</sup> cycle  | 45.15 ± 13.88 | 6 | 60.65 ± 10.04 | 4 | 51.35 ± 14.31 | 18.18 ± 15.36 | 6 | 0.0006*  |
| BALF                   | 10 <sup>th</sup> cycle | 218.6 ± 66.08 | 6 | 253.1 ± 54.40 | 4 | 232.4 ± 61.08 | 69.78 ± 57.40 | 6 | 0.0001*  |
| BALF                   | 20 <sup>th</sup> cycle | 250.9 ± 44.94 | 6 | 261.5 ± 36.69 | 4 | 255.1 ± 40.01 | 86.18 ± 67.59 | 6 | <0.0001* |
| <b>Hysteresis</b>      |                        |               |   |               |   |               |               |   |          |
| BALF                   | 10 <sup>th</sup> cycle | 0.690 ± 0.723 | 6 | 0.898 ± 0.78  | 4 | 0.773 ± 0.71  | 3.04 ± 1.61   | 6 | 0.0015*  |
| BALF                   | 20 <sup>th</sup> cycle | 0.322 ± 0.367 | 6 | 1.165 ± 1.691 | 4 | 0.659 ± 1.03  | 2.73 ± 1.55   | 6 | 0.0076*  |

Data presented as mean ± SD; \* *p*-value of ≤0.05 is considered significant between the Control and MPS IIIA groups; BALF – bronchoalveolar lavage fluid; BMP - Bis(monoacylglycerol)phosphate; PC – Phosphatidylcholine, PG – Phosphatidylglycerol, PE – Phosphatidylethanolamine, PS – Phosphatidylserine, SM – Sphingomyelin.
